# Supplementary material
Source: Royal Society of Chemistry journal article supplement (https://www.rsc.org/suppdata/dt/1998/571/k706190.doc)
Supplement: Supplementary file 1 [file k706190.doc]

List of Crystallographic and Supplementary Materials for

"**Interactions between the Diruthenium Core and Axial Acetylides**..."

Lin, C. *et al*.

| Page |  | Contents |
| --- | --- | --- |
| 2 | Figure S1 | UV-vis absorption spectra |
| 3 | Table S1 | Crystal Data of **3** |
| 4-5 | Table S2 | Fractional Coordinates of **3** |
| 6-8 | Table S3 | Bond Lengths and Angles for **3** |
| 9-10 | Table S4 | Anisotropic Displacement Parameters (2 x 103) for **3** |
| 11 | Table S5 | IR and 13C NMR data |
| 12 | Table S6 | Upper Valence Molecular Orbitals for Model **8a** |
| 13 | Table S7 | Upper Valence Molecular Orbitals for Model **8b** |
| 14 |  | Descending symmetry analysis (from **8a** to **8b**) |

Figure S1. UV-vis spectra of compounds **1** - **7**. [**1**] = 35.09 mM; [**2**] = 24.47 mM; [**3**] = 54.75 mM; [**4**] = 47.92 mM; [**5**] = 43.35 mM; [**6**] = 60.49 mM; [**7**] = 28.77 mM.

**Table S1**. Crystal Data for **3**.2C6H6

| Formula | C92H70Cl8N8Ru2 |
| --- | --- |
| Formula weight | 1773.30 |
| Cryst syst | monoclinic |
| Space group | *P*21/*n* |
| *a*, | 16.290(7) |
| *b*, | 15.700(6) |
| *c*, | 16.946(8) |
| b, deg | 107.43(3) |
| Volume, 3 | 4135(3) |
| Z | 2 |
| rcalc, g cm-3 | 1.424 |
| m, mm-1 | 0.675 |
| l, | 0.71073 |
| F(000) | 1804 |
| Crystal size, mm | 0.20 x 0.20 x 0.02 |
| q range, deg | 1.81 to 26.29 |
| Index ranges | 0²h²20, 0²k²19, -21²l²20 |
| Reflections collected | 8622 |
| Independent reflections | 8331 [R(int) = 0.0381] |
| Refinement method | Full-matrix least-squares on F2 |
| Data/restraints/parameters | 8331 / 0 / 496 |
| Instrument | Siemens R3m/V |
| T, K | 294(2) |
| Final R indices (I>2s(I)) | R1 = 0.0449, wR2 = 0.0973 |
| R indices (all data) | R1 = 0.1078, wR2 = 0.1048 |
| Goodness-of-fit on F2[[1]](#footnote-2)c | 0.623 |
| Largest diff. peak and hole, e/3 | 0.349 and -0.387 |

**Table S2.** Atomic Coordinates (x104) and Equivalent Isotropic Displacement Parameters (2x103) for **3**.2C6H6. U(eq) is defined as one third of the trace of the orthogonalized Uij tensor.

_______________________________________________________________

Atom x y z U(eq)

_______________________________________________________________

Ru(1) 4999(1) 688(1) 9596(1) 32(1)

Cl(1) 5740(1) 754(1) 5623(1) 85(1)

Cl(2) 2802(1) -4698(1) 9170(1) 90(1)

Cl(3) 8427(2) 3472(1) 9099(2) 124(1)

Cl(4) 8667(1) -3583(1) 11262(1) 74(1)

N(1) 4797(3) -184(3) 8621(2) 36(1)

N(2) 4627(3) -1394(2) 9366(2) 35(1)

N(3) 6247(2) 655(3) 9658(2) 34(1)

N(4) 6257(2) -670(3) 10300(2) 34(1)

C(1) 5008(4) 39(3) 7891(3) 34(1)

C(2) 5790(4) -203(4) 7809(3) 49(2)

C(3) 6012(4) 11(4) 7124(4) 58(2)

C(4) 5433(5) 466(4) 6486(4) 55(2)

C(5) 4639(4) 687(4) 6550(3) 52(2)

C(6) 4433(4) 460(3) 7246(3) 46(2)

C(7) 4637(3) -1009(3) 8681(3) 38(1)

C(8) 4220(3) -2208(3) 9278(3) 39(1)

C(9) 4571(4) -2877(3) 9786(4) 53(2)

C(10) 4159(4) -3640(3) 9762(4) 62(2)

C(11) 3370(4) -3740(4) 9191(4) 55(2)

C(12) 2983(4) -3108(4) 8655(4) 60(2)

C(13) 3424(4) -2341(4) 8689(3) 48(2)

C(14) 6790(4) 1319(3) 9503(3) 39(1)

C(15) 7586(4) 1493(4) 10069(4) 52(2)

C(16) 8087(4) 2147(4) 9937(4) 63(2)

C(17) 7823(4) 2626(4) 9232(4) 66(2)

C(18) 7031(4) 2456(4) 8659(4) 64(2)

C(19) 6517(4) 1799(4) 8785(4) 54(2)

C(20) 6641(3) -50(3) 10003(3) 36(1)

C(21) 6820(3) -1401(3) 10546(3) 36(1)

C(22) 7457(4) -1398(3) 11308(3) 45(2)

C(23) 8017(4) -2072(4) 11519(3) 48(2)

C(24) 7955(4) -2735(3) 11002(4) 44(1)

C(25) 7313(4) -2763(3) 10242(4) 52(2)

C(26) 6737(3) -2077(4) 10026(4) 49(2)

C(27) 4565(4) 1596(3) 8755(3) 38(1)

C(28) 4357(4) 2190(3) 8297(3) 42(2)

C(29) 4229(3) 2941(3) 7812(3) 41(1)

C(30) 4667(4) 3111(4) 7237(4) 58(2)

C(31) 4561(4) 3879(4) 6828(4) 66(2)

C(32) 4035(5) 4485(4) 6956(4) 72(2)

C(33) 3609(5) 4351(4) 7515(4) 78(2)

C(34) 3679(4) 3587(4) 7936(4) 60(2)

C(1S) 1847(7) 1224(9) 1442(7) 129(4)

C(2S) 1653(7) 416(7) 1075(8) 126(4)

**Table S2**. *cont.*

_______________________________________________________________

Atom x y z U(eq)

_______________________________________________________________

C(3S) 1103(7) 372(7) 299(8) 108(3)

C(4S) 708(7) 1070(9) -118(6) 116(3)

C(5S) 863(8) 1854(8) 269(9) 130(4)

C(6S) 1454(8) 1921(8) 1095(8) 120(4)

C(7S) 11833(9) -1122(12) 12921(12) 181(8)

C(8S) 11363(12) -1808(10) 12555(8) 166(5)

C(9S) 10577(9) -1904(8) 12612(8) 131(4)

C(10S) 10337(7) -1341(12) 13082(9) 143(4)

C(11S) 10813(11) -704(12) 13463(8) 163(5)

C(12S) 11598(14) -565(12) 13387(8) 191(9)

**Table S3**. Full List of Bond Distances () and Angles (deg) for **3**.2C6H6*a*

**Bond Distances**

| Ru(1)-C(27) | 1.991(5) | C(14)-C(19) | 1.387(7) |
| --- | --- | --- | --- |
| Ru(1)-N(3) | 2.006(4) | C(14)-C(15) | 1.390(7) |
| Ru(1)-N(2)#1 | 2.012(4) | C(15)-C(16) | 1.371(7) |
| Ru(1)-N(1) | 2.094(4) | C(16)-C(17) | 1.368(8) |
| Ru(1)-N(4)#1 | 2.105(4) | C(17)-C(18) | 1.389(8) |
| Ru(1)-Ru(1)#1 | 2.5554(12) | C(18)-C(19) | 1.385(7) |
| Cl(1)-C(4) | 1.741(6) | C(21)-C(26) | 1.360(7) |
| Cl(2)-C(11) | 1.760(6) | C(21)-C(22) | 1.393(7) |
| Cl(3)-C(17) | 1.706(6) | C(22)-C(23) | 1.372(7) |
| Cl(4)-C(24) | 1.734(5) | C(23)-C(24) | 1.345(7) |
| N(1)-C(7) | 1.330(6) | C(24)-C(25) | 1.395(7) |
| N(1)-C(1) | 1.424(6) | C(25)-C(26) | 1.404(7) |
| N(2)-C(7) | 1.314(6) | C(27)-C(28) | 1.195(7) |
| N(2)-C(8) | 1.428(6) | C(28)-C(29) | 1.417(7) |
| N(2)-Ru(1)#1 | 2.012(4) | C(29)-C(30) | 1.394(7) |
| N(3)-C(20) | 1.324(6) | C(29)-C(34) | 1.411(7) |
| N(3)-C(14) | 1.441(6) | C(30)-C(31) | 1.376(7) |
| N(4)-C(20) | 1.335(6) | C(31)-C(32) | 1.341(8) |
| N(4)-C(21) | 1.450(6) | C(32)-C(33) | 1.348(8) |
| N(4)-Ru(1)#1 | 2.105(4) | C(33)-C(34) | 1.384(8) |
| C(1)-C(2) | 1.375(7) | C(1S)-C(6S) | 1.314(12) |
| C(1)-C(6) | 1.377(6) | C(1S)-C(2S) | 1.406(12) |
| C(2)-C(3) | 1.357(7) | C(2S)-C(3S) | 1.353(11) |
| C(3)-C(4) | 1.399(8) | C(3S)-C(4S) | 1.358(11) |
| C(4)-C(5) | 1.375(8) | C(4S)-C(5S) | 1.381(12) |
| C(5)-C(6) | 1.365(7) | C(5S)-C(6S) | 1.447(13) |
| C(8)-C(9) | 1.369(7) | C(7S)-C(12S) | 1.31(2) |
| C(8)-C(13) | 1.395(7) | C(7S)-C(8S) | 1.36(2) |
| C(9)-C(10) | 1.368(7) | C(8S)-C(9S) | 1.322(13) |
| C(10)-C(11) | 1.366(8) | C(9S)-C(10S) | 1.324(13) |
| C(11)-C(12) | 1.365(8) | C(10S)-C(11S) | 1.31(2) |
| C(12)-C(13) | 1.395(7) | C(11S)-C(12S) | 1.34(2) |

Table S3. *cont.*

**Angles**

| C(27)-Ru(1)-N(3) | 101.1(2) | C(11)-C(12)-C(13) | 118.1(6) |
| --- | --- | --- | --- |
| C(27)-Ru(1)-N(2)#1 | 100.4(2) | C(12)-C(13)-C(8) | 121.0(5) |
| N(3)-Ru(1)-N(2)#1 | 86.1(2) | C(19)-C(14)-C(15) | 119.1(5) |
| C(27)-Ru(1)-N(1) | 88.0(2) | C(19)-C(14)-N(3) | 120.0(5) |
| N(3)-Ru(1)-N(1) | 86.6(2) | C(15)-C(14)-N(3) | 120.9(5) |
| N(2)#1-Ru(1)-N(1) | 169.8(2) | C(16)-C(15)-C(14) | 120.9(5) |
| C(27)-Ru(1)-N(4)#1 | 85.6(2) | C(17)-C(16)-C(15) | 120.5(6) |
| N(3)-Ru(1)-N(4)#1 | 172.3(2) | C(16)-C(17)-C(18) | 119.2(5) |
| N(2)#1-Ru(1)-N(4)#1 | 89.0(2) | C(16)-C(17)-Cl(3) | 120.0(5) |
| N(1)-Ru(1)-N(4)#1 | 97.5(2) | C(18)-C(17)-Cl(3) | 120.6(5) |
| C(27)-Ru(1)-Ru(1)#1 | 158.8(2) | C(19)-C(18)-C(17) | 120.9(6) |
| N(3)-Ru(1)-Ru(1)#1 | 96.38(12) | C(18)-C(19)-C(14) | 119.4(6) |
| N(2)#1-Ru(1)-Ru(1)#1 | 92.66(12) | N(3)-C(20)-N(4) | 123.8(5) |
| N(1)-Ru(1)-Ru(1)#1 | 81.06(12) | C(26)-C(21)-C(22) | 120.3(5) |
| N(4)#1-Ru(1)-Ru(1)#1 | 77.89(12) | C(26)-C(21)-N(4) | 120.0(5) |
| C(7)-N(1)-C(1) | 114.1(4) | C(22)-C(21)-N(4) | 119.7(5) |
| C(7)-N(1)-Ru(1) | 124.4(4) | C(23)-C(22)-C(21) | 119.4(5) |
| C(1)-N(1)-Ru(1) | 120.2(3) | C(24)-C(23)-C(22) | 120.8(5) |
| C(7)-N(2)-C(8) | 116.6(4) | C(23)-C(24)-C(25) | 121.0(5) |
| C(7)-N(2)-Ru(1)#1 | 116.0(3) | C(23)-C(24)-Cl(4) | 121.0(5) |
| C(8)-N(2)-Ru(1)#1 | 126.5(3) | C(25)-C(24)-Cl(4) | 118.0(4) |
| C(20)-N(3)-C(14) | 116.3(4) | C(24)-C(25)-C(26) | 118.3(5) |
| C(20)-N(3)-Ru(1) | 113.2(3) | C(21)-C(26)-C(25) | 120.1(5) |
| C(14)-N(3)-Ru(1) | 129.8(3) | C(28)-C(27)-Ru(1) | 174.0(5) |
| C(20)-N(4)-C(21) | 111.0(4) | C(27)-C(28)-C(29) | 171.8(6) |
| C(20)-N(4)-Ru(1)#1 | 128.2(3) | C(30)-C(29)-C(34) | 116.6(5) |
| C(21)-N(4)-Ru(1)#1 | 120.8(3) | C(30)-C(29)-C(28) | 123.2(5) |
| C(2)-C(1)-C(6) | 118.9(5) | C(34)-C(29)-C(28) | 120.0(5) |
| C(2)-C(1)-N(1) | 119.4(5) | C(31)-C(30)-C(29) | 120.5(6) |
| C(6)-C(1)-N(1) | 121.6(5) | C(32)-C(31)-C(30) | 122.0(6) |
| C(3)-C(2)-C(1) | 120.6(6) | C(31)-C(32)-C(33) | 119.5(6) |
| C(2)-C(3)-C(4) | 119.9(6) | C(32)-C(33)-C(34) | 121.2(6) |
| C(5)-C(4)-C(3) | 120.0(5) | C(33)-C(34)-C(29) | 120.3(6) |

Table S3. *cont.*

**Angles**

| C(5)-C(4)-Cl(1) | 121.0(5) | C(6S)-C(1S)-C(2S) | 122.6(11) |
| --- | --- | --- | --- |
| C(3)-C(4)-Cl(1) | 119.1(5) | C(3S)-C(2S)-C(1S) | 118.1(10) |
| C(6)-C(5)-C(4) | 118.9(5) | C(2S)-C(3S)-C(4S) | 122.5(10) |
| C(5)-C(6)-C(1) | 121.7(5) | C(3S)-C(4S)-C(5S) | 118.8(11) |
| N(2)-C(7)-N(1) | 124.7(5) | C(4S)-C(5S)-C(6S) | 119.9(11) |
| C(9)-C(8)-C(13) | 117.3(5) | C(1S)-C(6S)-C(5S) | 117.8(12) |
| C(9)-C(8)-N(2) | 121.8(5) | C(12S)-C(7S)-C(8S) | 125(2) |
| C(13)-C(8)-N(2) | 120.8(5) | C(9S)-C(8S)-C(7S) | 118.8(14) |
| C(10)-C(9)-C(8) | 122.9(6) | C(8S)-C(9S)-C(10S) | 115.8(14) |
| C(11)-C(10)-C(9) | 118.1(6) | C(11S)-C(10S)-C(9S) | 124.6(13) |
| C(12)-C(11)-C(10) | 122.4(6) | C(10S)-C(11S)-C(12S) | 121(2) |
| C(12)-C(11)-Cl(2) | 118.2(5) | C(7S)-C(12S)-C(11S) | 114(2) |
| C(10)-C(11)-Cl(2) | 119.4(5) |  |  |

*a* Symmetry transformations used to generate equivalent atoms #1: -x+1,-y,-z+2

**TableS4**. Anisotropic displacement parameters (2 x 103) for **3**.2C6H6.

| Atom | *U*11 | *U*22 | *U*33 | *U*23 | *U*13 | *U*12 |
| --- | --- | --- | --- | --- | --- | --- |
| Ru(1) | 35(1) | 24(1) | 35(1) | 4(1) | 9(1) | -2(1) |
| Cl(1) | 124(2) | 85(1) | 59(1) | 2(1) | 46(1) | -29(1) |
| Cl(2) | 109(2) | 55(1) | 108(2) | -6(1) | 34(1) | -45(1) |
| Cl(3) | 121(2) | 101(2) | 143(2) | 34(2) | 32(2) | -69(2) |
| Cl(4) | 72(1) | 47(1) | 96(1) | 15(1) | 17(1) | 26(1) |
| N(1) | 41(3) | 32(3) | 34(3) | 4(2) | 8(2) | -1(2) |
| N(2) | 43(3) | 19(2) | 40(3) | 3(2) | 8(2) | -2(2) |
| N(3) | 36(2) | 29(2) | 39(2) | 11(2) | 14(2) | -5(2) |
| N(4) | 35(2) | 29(2) | 36(2) | 5(2) | 11(2) | 3(2) |
| C(1) | 46(3) | 25(3) | 30(3) | -4(2) | 10(3) | -8(3) |
| C(2) | 60(4) | 48(4) | 37(3) | 1(3) | 11(3) | 9(3) |
| C(3) | 64(4) | 66(4) | 49(4) | -12(4) | 26(4) | 0(4) |
| C(4) | 83(5) | 48(4) | 41(4) | -10(3) | 27(4) | -18(3) |
| C(5) | 72(4) | 47(3) | 33(3) | 8(3) | 11(3) | 0(4) |
| C(6) | 42(4) | 35(3) | 54(4) | -1(3) | 6(3) | 4(3) |
| C(7) | 48(4) | 31(3) | 34(3) | 2(2) | 11(3) | -2(3) |
| C(8) | 40(4) | 28(3) | 46(3) | -5(3) | 10(3) | -7(3) |
| C(9) | 69(4) | 24(3) | 59(4) | 1(3) | 8(3) | -13(3) |
| C(10) | 91(5) | 30(3) | 58(4) | 6(3) | 10(4) | -11(3) |
| C(11) | 75(5) | 41(4) | 58(4) | -11(3) | 34(4) | -22(4) |
| C(12) | 61(5) | 50(4) | 66(4) | -11(4) | 14(4) | -20(4) |
| C(13) | 51(4) | 44(3) | 45(3) | -2(3) | 9(3) | -3(3) |
| C(14) | 44(4) | 29(3) | 45(4) | 9(3) | 16(3) | -2(3) |
| C(15) | 62(4) | 40(3) | 53(4) | 13(3) | 14(3) | -10(3) |
| C(16) | 49(4) | 69(5) | 65(4) | 1(4) | 10(3) | -25(4) |
| C(17) | 70(5) | 56(4) | 67(5) | 15(4) | 15(4) | -29(4) |
| C(18) | 75(5) | 58(4) | 64(4) | 35(4) | 26(4) | -11(4) |
| C(19) | 41(4) | 51(4) | 69(4) | 16(3) | 18(3) | -12(3) |
| C(20) | 37(3) | 31(3) | 38(3) | 0(3) | 8(3) | -4(3) |
| C(21) | 32(3) | 26(3) | 47(4) | 3(3) | 8(3) | 4(2) |
| C(22) | 56(4) | 27(3) | 43(3) | -1(3) | 2(3) | -1(3) |
| C(23) | 48(4) | 54(4) | 36(3) | 5(3) | 1(3) | 5(3) |
| C(24) | 54(4) | 29(3) | 54(4) | 10(3) | 24(3) | 9(3) |
| C(25) | 70(5) | 30(3) | 58(4) | -7(3) | 19(4) | 5(3) |
| C(26) | 41(4) | 47(4) | 51(4) | -4(3) | 3(3) | 8(3) |
| C(27) | 49(4) | 32(3) | 36(3) | 0(3) | 16(3) | -7(3) |
| C(28) | 51(4) | 36(3) | 40(3) | 2(3) | 14(3) | -11(3) |
| C(29) | 46(4) | 33(3) | 38(3) | 13(3) | 5(3) | -4(3) |
| C(30) | 60(4) | 53(4) | 65(4) | 15(3) | 27(4) | 9(3) |
| C(31) | 76(5) | 63(4) | 64(4) | 32(4) | 27(4) | 1(4) |
| C(32) | 111(6) | 50(5) | 63(4) | 26(3) | 36(4) | 14(4) |
| C(33) | 121(6) | 36(4) | 87(5) | 19(4) | 45(5) | 27(4) |
| C(34) | 78(5) | 49(4) | 65(4) | 21(3) | 40(4) | 12(4) |
| C(1S) | 101(8) | 147(10) | 135(10) | -31(9) | 26(7) | 14(8) |
| C(2S) | 119(9) | 135(10) | 136(10) | -24(8) | 55(8) | 39(7) |
| C(3S) | 93(8) | 113(9) | 131(9) | -41(7) | 52(7) | -10(7) |
| C(4S) | 109(8) | 130(9) | 117(8) | 6(8) | 49(6) | 2(8) |
| C(5S) | 152(11) | 100(9) | 180(12) | 53(9) | 113(10) | 14(8) |
| C(6S) | 118(10) | 119(10) | 138(11) | -5(9) | 60(8) | -12(8) |

TableS4. *cont.*

| Atom | *U*11 | *U*22 | *U*33 | *U*23 | *U*13 | *U*12 |
| --- | --- | --- | --- | --- | --- | --- |
| C(7S) | 105(9) | 211(19) | 215(19) | 7(12) | 30(11) | -94(11) |
| C(8S) | 148(13) | 177(15) | 189(13) | -10(11) | 75(12) | 24(11) |
| C(9S) | 117(12) | 107(9) | 162(12) | 4(8) | 33(9) | -14(8) |
| C(10S) | 94(9) | 193(15) | 146(12) | 1(10) | 44(8) | -26(10) |
| C(11S) | 129(11) | 203(15) | 147(11) | -48(10) | 24(10) | -24(11) |
| C(12S) | 214(21) | 197(18) | 103(10) | 39(10) | -42(12) | -94(17) |

**TableS5**. IR data for Compounds **1** - **7**.

| **Compound** (X) | IR data (cm-1) | 13C NMR data  d (ppm) |
| --- | --- | --- |
|  |  |  |
| **1**(*p*-OMe) | 1610(m), 1501(s), 1460(m), 1442(m), 1336(w), 1296(m), 1248(s), 1215(s), 1175(m), 1109(w), 1033(m), 938(w), 828(m), 758(m), 696(m), 597(w), 539(w) | 168.2, 157.1, 149.4, 136.8, 131.2, 127.9, 126.7, 126.3, 124.0, 112.9, 55.5, 49.4. |
| **2**(H) | 1591(m), 1539(s), 1486(s), 1450(w), 1331(m), 1219(s), 1081(w), 1032(w), 956(w), 933(w), 782(w), 759(m), 696(s), 528(w), 433(w) | 168.6, 155.6, 137.5, 131.3, 127.8, 127.5, 126.7, 125.6, 125.3, 124.2, 46.5. |
| **3**(*p*-Cl) | 1595(m), 1525(s), 1484(s), 1345(m), 1324(m), 1213(s), 1091(s), 1018(s), 959(w), 931(w), 827(s), 754(m), 740(w), 695(m), 532(w), 494(w) | 168.6, 153.5, 139.2, 134.2, 131.6, 131.0, 128.2, 127.4, 126.3, 125.5, 43.0. |
| **4**(*m*-Cl) | 1591(s), 1574(m), 1525(s), 1477(s), 1421(w), 1345(m), 1327(m), 1275(w), 1209(s), 1168(w), 1095(m), 1074(m), 1025(w), 997(w), 966(m), 890(m), 782(m), 754(m), 740(m), 692(s), 584(w), 525(w), 463(w), 438(m) | 168.8, 155.7, 140.4, 133.9, 131.8, 129.2, 126.6, 126.2, 126.0, 125.9, 125.3, 123.1, 40.1. |
| **5**(*m*-CF3) | 1595(w), 1525(m), 1487(m), 1439(m), 1327(s), 1272(m), 1213(m), 1168(s), 1126(s), 1095(m), 1070(m), 1004(w), 970(m), 894(m), 800(m), 758(m), 699(s), 664(m), 525(w), 438(w) | 169.4, 154.8, 141.3, 131.5, 131.2, 129.1, 128.9, 126.6, 125.8, 125.1, 123.1, 121.9, 118.9, 37.5. |
| **6**(3,4-Cl2) | 1585(w), 1525(s), 1463(s), 1380(w), 1348(m), 1324(m), 1258(m), 1213(m), 1129(s), 1032(m), 973(m), 907(w), 872(w), 813(m), 772(w), 754(m), 695(m), 681(m), 598(w), 546(w), 522(w), 456(w) | 168.7, 153.4, 141.9, 132.6, 131.5, 130.7, 130.0, 127.3, 126.3, 125.1, 123.7, 38.5. |
| **7**(3,5-Cl2) | 1585(s), 1567(s), 1522(s), 1425(s), 1352(m), 1321(m), 1248(w), 1216(m), 1109(m), 1001(s), 935(m), 852(m), 806(s), 754(m), 730(m), 699(m), 674(m), 660(w), 595(w), 542(w), 438(w) | 168.8, 155.3, 143.2, 135.0, 132.1, 126.7, 126.6, 126.4, 124.7, 123.7, 35.0. |

**TableS6**. Upper Valence Molecule Orbitals of Model Compounds **8a**, *D*4h Symmetry

| Symbol | # | E(eV) | Assignment | Characters (%)[[2]](#footnote-3)¤ |
| --- | --- | --- | --- | --- |
|  |  |  |  |  |
| 2*a*1u | 57 | 3.06 | p*(N-C-N) | N *p*p (42); Cm *p*p (58) |
|  |  |  |  |  |
| 3*b*2g | 56 | 3.04 | p*(N-C-N) | Ru *d*xy (10); N *p*p (42); Cm *p*p (47) |
|  |  |  |  |  |
| 8*e*u | 55 | 2.06 | p*(N-C-N) | N *p*p (41); Cm *p*p (57) |
|  |  |  |  |  |
| 2*b*1u | 53 | -5.68 | d*(Ru-Ru) | Ru *d*xy (72); N *p*p (28) |
|  |  |  |  |  |
| 8*a*1g | 52 | -6.75 | s*(Ru-C), LUMO | Ru *d*z2(24),*p*z(46),*s*(6); Ca *p*s(19); N(*sp*)s (4) |
|  |  |  |  |  |
| 6*e*g | 51 | -7.41 | p*(Ru-Ru), HOMO | Ru *d*xz,yz (87); Cb *p*p (10) |
|  |  |  |  |  |
| 2*b*2g | 49 | -9.43 | d(Ru-Ru) | Ru *d*xy (83); Cm *p*p (17) |
|  |  |  |  |  |
| 7*e*u | 48 | -10.23 | p(Ru-Ru) | Ru *d*xz,yz (82); Cb *p*p (14) |
|  |  |  |  |  |
| 1*a*1u | 46 | -11.43 | p(N-C-N) | N *p*p (100) |
|  |  |  |  |  |
| 5*e*g | 45 | -12.45 | p(N-C-N) | N *p*p (96) |
|  |  |  |  |  |
| 4*e*g | 43 | -14.34 | p(CºC) | Ca *p*p (50); Cb *p*p (44) |
|  |  |  |  |  |
| 6*e*u | 41 | -14.46 | p(CºC) | Ru *d*xz,yz (14); Ca *p*p (35); Cb *p*p (31) |
|  |  |  |  |  |
| 5*e*u | 39 | -14.85 | s(Ru-N) and p(CºC) | Ru *p*s (11); N *p*s (51); Ca *p*p (13); Cb *p*p (8) |
|  |  |  |  |  |
| 1*b*1u | 37 | -15.71 | p(N-C-N) | Ru *d*xy (28); N *p*p (72) |
|  |  |  |  |  |
| 6*a*2u | 36 | -15.89 | s(Ru-C) | Ru (*dsp*)s (32); Ca (*sp*)s (60) |
|  |  |  |  |  |
| 7*a*1g | 35 | -16.74 | s(Ru-C) and s(Ru-N) | Ru (*dsp*)s (27); N (*sp*)s (26) Ca (*sp*)s (37) |
|  |  |  |  |  |
| 3*e*g | 34 | -16.83 | s(Ru-N) | Ru *p*s (15); N (*sp*)s (79) |
|  |  |  |  |  |
| 6*a*1g | 32 | -17.79 | s(Ru-N) and s(Ru-C) | Ru *d*z2 (42); N (*sp*)s (31) Ca *p*s (10) |

**TableS7**.Upper Valence Molecular Orbitals of Model Compounds **8b**, C2h Symmetry

| Symbol |  | E (eV) | Assignment | Characters (%)[[3]](#footnote-4)$ |
| --- | --- | --- | --- | --- |
|  |  |  |  |  |
| 17*b*u | 58 | 5.94 | s*(Ru-C) | Ru (*dsp*)s (54); N (*sp*)s (12); Ca *p*s (20); Cb *p* (10) |
|  |  |  |  |  |
| 12*b*g | 57 | 4.39 | p*(N-C-N) | N *p*p (42); Cm *p*p (58) |
|  |  |  |  |  |
| 17*a*g | 56 | 4.21 | p*(N-C-N) | Ru *d*x2-y2 (8); N *p*p (43); Cm *p*p (49) |
|  |  |  |  |  |
| 12*a*u | 55 | 3.47 | p*(N-C-N) | N *p*p (42); Cm *p*p (57) |
|  |  |  |  |  |
| 16*b*u | 54 | 3.15 | p*(N-C-N) | N *p*p (40); Cm *p*p (54) |
|  |  |  |  |  |
| 16*a*g | 53 | -4.55 |  | Ru *d*xz (41), *p*z (36) |
|  |  |  |  |  |
| 15*b*u | 52 | -5.99 | d*(Ru-Ru), LUMO | Ru *d*x2-y2 (70) |
|  |  |  |  |  |
| 11*b*g | 51 | -7.80 | p*(Ru-Ru), HOMO | Ru *d*yz (84), *d*xy (3); Cb *p*p (10) |
|  |  |  |  |  |
| 15*a*g | 50 | -9.51 | d(Ru-Ru) | Ru *d*x2-y2 (73), *d*xz (8) |
|  |  |  |  |  |
| 14*b*u | 49 | -9.76 | p(Ru-Ru) | Ru *d*z2 (15), *d*xz (61) |
|  |  |  |  |  |
| 14*a*g | 48 | -9.94 |  | Ru *d*z2 (28), *d*xz (29), *d*x2-y2 (9) |
|  |  |  |  |  |
| 11*a*u | 47 | -10.30 | p(Ru-Ru) | Ru *d*yz (70) |
|  |  |  |  |  |
| 10*a*u | 46 | -11.72 | p(N-C-N) | N *p*p (90) |
|  |  |  |  |  |
| 10*b*g | 45 | -12.45 | p(N-C-N) | N *p*p (99) |
|  |  |  |  |  |
| 13*a*g | 44 | -12.71 | p(N-C-N) | N *p*p (97) |
|  |  |  |  |  |
| 13*b*u | 43 | -14.15 | p(CºC) | Ru *d*xz (9); Ca *p*p (29); Cb *p*p (28) |
|  |  |  |  |  |
| 9*b*g | 42 | -14.21 | p(CºC) | Ca *p*p (49); Cb *p*p (44) |
|  |  |  |  |  |
| 12*a*g | 41 | -14.22 | p(CC) | Ca *p*p (39); Cb *p*p (39) |
|  |  |  |  |  |
| 9*a*u | 40 | -14.23 |  | Ru *d*yz(10), *p*y (9); N *p*x,*p*y(35); Ca *p*p(15); Cb *p*p(15) |
|  |  |  |  |  |
| 8*a*u | 39 | -14.65 | p(CºC) | Ca *p*p (32); Cb *p*p (22) |
|  |  |  |  |  |
| 12*b*u | 38 | -14.66 | s(Ru-N) and p(CºC) | Ru *p*s (9); N *p*s (46); Ca *p*p (15); Cb *p*p (9) |
|  |  |  |  |  |
| 11*b*u | 37 | -15.80 | s(Ru-N) | Ru *d*x2-y2 (22); N *p*s (60) |
|  |  |  |  |  |
| 10*b*u | 36 | -16.25 | s(Ru-C) | Ru (*dsp*)s (35); Ca (*sp*)s (48) |
|  |  |  |  |  |
| 11*a*g | 35 | -16.46 | s(Ru-C) | Ru (*dsp*)s (28); Ca (*sp*)s (31) |
|  |  |  |  |  |
| 8*b*g | 34 | -16.74 | s(Ru-N) | Ru *p*y (15); N (*sp*)s (78) |

**Symmetry Correlation between *D*4h and *C*2h**

| *C*2h(*D*4h) | E(E) | C2(C2") | *i*(*i*) | sh(sd) |
| --- | --- | --- | --- | --- |
| Ag | 1 | 1 | 1 | 1 |
| Bg | 1 | -1 | 1 | -1 |
| Au | 1 | 1 | -1 | -1 |
| Bu | 1 | -1 | -1 | 1 |
|  |  |  |  |  |
| Corresponding Characters for Irreducible Representations of *D*4h | | | | |
| A1g | 1 | 1 | 1 | 1 |
| A2g | 1 | -1 | 1 | -1 |
| B1g | 1 | -1 | 1 | -1 |
| B2g | 1 | 1 | 1 | 1 |
| Eg | 2 | 0 | 2 | 0 |
| A1u | 1 | 1 | -1 | -1 |
| A2u | 1 | -1 | -1 | 1 |
| B1u | 1 | -1 | -1 | 1 |
| B2u | 1 | 1 | -1 | -1 |
| Eu | 2 | 0 | -2 | 0 |

Correlation Table

| *D*4h |  | *C*2h | *D*4h |  | *C*2h |
| --- | --- | --- | --- | --- | --- |
| A1g | ----> | Ag | A1u | ----> | Au |
| A2g | ----> | Bg | A2u | ----> | Bu |
| B1g | ----> | Bg | B1u | ----> | Bu |
| B2g | ----> | Ag | B2u | ----> | Au |
| Eg | ----> | Ag+Bg | Eu | ----> | Au+Bu |

On the basis of correlation table, the occupied valence MOs for **8a** can be symmetry-descended to 15 of *a*g, 11 of *b*g, 11 of *a*u, and 14 of *b*u, which are the same as the results calculated for **8b**.

1. c Goodness-of-fit = [ S [ w(Fo2 - Fc2)2] / (n-p) ]1/2 [↑](#footnote-ref-2)
2. ¤ Ca, Cb, and Cm are the a, b carbons of acetylide and methine carbon of formamidinate, respectively. [↑](#footnote-ref-3)
3. $ Ca, Cb, and Cm are the a, b carbons of acetylide and methine carbon of formamidinate, respectively. [↑](#footnote-ref-4)
